# Supplementary material for: IMUs Can Estimate Hip and Knee Range of Motion during Walking Tasks but Are Not Sensitive to Changes in Load or Grade
Source: MDPI journal article supplement (doi:10.3390/s24051675), 2024-03-05
Supplement: s1 [file s1]

**Table S1a:** Mean  $\pm$  SD (degrees) of joint angles and range of motion (ROM) for IMUs for each load (*unloaded, loaded*) and grade (*flat, uphill, downhill*) while walking.

| Walking            |                    |                    |                    |                    |                    |                    |
|--------------------|--------------------|--------------------|--------------------|--------------------|--------------------|--------------------|
|                    | Flat               |                    | Uphill             |                    | Downhill           |                    |
| Ankle              | Unloaded           | Loaded             | Unloaded           | Loaded             | Unloaded           | Loaded             |
| PFLX               | 24.1° $\pm$ 18.9°  | 23.1° $\pm$ 11.8°  | 27.9° $\pm$ 18.4°  | 31.8° $\pm$ 34.1°  | 32.1° $\pm$ 32.7°  | 35.9° $\pm$ 23.9°  |
| DFLX <sup>b</sup>  | -57.9° $\pm$ 19.4° | -60.4° $\pm$ 15.9° | -62.2° $\pm$ 18.4° | -64.4° $\pm$ 15.2° | -68.3° $\pm$ 15.9° | -69.0° $\pm$ 20.5° |
| ROM <sup>b</sup>   | 81.9° $\pm$ 20.0°  | 83.5° $\pm$ 20.3°  | 90.1° $\pm$ 23.5°  | 96.2° $\pm$ 31.8°  | 100.4° $\pm$ 30.2° | 104.9° $\pm$ 23.9° |
| Knee               |                    |                    |                    |                    |                    |                    |
| EXT                | 45.7° $\pm$ 11.3°  | 45.1° $\pm$ 13.6°  | 45.0° $\pm$ 9.7°   | 46.3° $\pm$ 12.9°  | 45.2° $\pm$ 16.0°  | 56.3° $\pm$ 19.6°  |
| FLX <sup>b</sup>   | -16.2° $\pm$ 11.1° | -21.9° $\pm$ 14.8° | -14.6° $\pm$ 14.2° | -15.0° $\pm$ 14.0° | -25.4° $\pm$ 20.8° | -30.5° $\pm$ 22.5° |
| ROM <sup>a,b</sup> | 61.9° $\pm$ 14.7°  | 67.0° $\pm$ 11.6°  | 59.6° $\pm$ 11.4°  | 61.3° $\pm$ 13.8°  | 70.7° $\pm$ 23.7°  | 86.8° $\pm$ 32.7°  |
| Hip                |                    |                    |                    |                    |                    |                    |
| FLX                | 17.7° $\pm$ 9.7°   | 23.1° $\pm$ 10.7°  | 19.1° $\pm$ 17.6°  | 23.6° $\pm$ 28.4°  | 21.8° $\pm$ 10.8°  | 24.4° $\pm$ 14.6°  |
| EXT                | -25.9° $\pm$ 14.0° | -24.1° $\pm$ 11.2° | -20.6° $\pm$ 21.1° | -19.5° $\pm$ 30.1° | -23.2° $\pm$ 7.2°  | -23.7° $\pm$ 12.9° |
| ROM                | 43.6° $\pm$ 10.7°  | 47.2° $\pm$ 11.2°  | 39.7° $\pm$ 7.7°   | 43.1° $\pm$ 10.2°  | 45.1° $\pm$ 10.3°  | 48.0° $\pm$ 15.7°  |

**Table S1b:** Mean  $\pm$  SD (degrees) of joint angles and range of motion (ROM) for IMUs for each load (*unloaded, loaded*) and grade (*flat, uphill, downhill*) while running.

| Running          |                    |                    |                    |                    |                    |                    |
|------------------|--------------------|--------------------|--------------------|--------------------|--------------------|--------------------|
|                  | Flat               |                    | Uphill             |                    | Downhill           |                    |
| Ankle            | Unloaded           | Loaded             | Unloaded           | Loaded             | Unloaded           | Loaded             |
| PFLX             | 44.3° $\pm$ 21.5°  | 38.6° $\pm$ 17.3°  | 45.1° $\pm$ 25.7°  | 40.8° $\pm$ 21.5°  | 42.9° $\pm$ 21.3°  | 38.5° $\pm$ 23.2°  |
| DFLX             | -79.7° $\pm$ 18.4° | -72.6° $\pm$ 18.7° | -75.5° $\pm$ 23.3° | -80.0° $\pm$ 18.9° | -77.5° $\pm$ 23.9° | -80.7° $\pm$ 21.5° |
| ROM              | 124.0° $\pm$ 31.9° | 111.2° $\pm$ 26.2° | 120.6° $\pm$ 43.2° | 120.8° $\pm$ 29.5° | 120.4° $\pm$ 29.8° | 119.2° $\pm$ 33.0° |
| Knee             |                    |                    |                    |                    |                    |                    |
| EXT <sup>b</sup> | 76.7° $\pm$ 22.3°  | 72.7° $\pm$ 24.9°  | 82.0° $\pm$ 26.5°  | 77.3° $\pm$ 21.7°  | 72.8° $\pm$ 24.5°  | 71.5° $\pm$ 21.2°  |
| FLX              | -44.6° $\pm$ 35.5° | -38.0° $\pm$ 35.7° | -46.7° $\pm$ 41.6° | -51.8° $\pm$ 42.4° | -44.7° $\pm$ 30.5° | -42.4° $\pm$ 31.2° |
| ROM              | 121.4° $\pm$ 55.0° | 110.6° $\pm$ 58.1° | 128.7° $\pm$ 66.3° | 129.1° $\pm$ 61.2° | 117.5° $\pm$ 51.2° | 113.9° $\pm$ 49.0° |
| Hip              |                    |                    |                    |                    |                    |                    |
| FLX              | 42.9° $\pm$ 27.7°  | 34.8° $\pm$ 25.6°  | 40.3° $\pm$ 25.5°  | 42.0° $\pm$ 25.1°  | 44.2° $\pm$ 29.9°  | 39.0° $\pm$ 27.6°  |
| EXT <sup>a</sup> | -56.3° $\pm$ 21.5° | -46.0° $\pm$ 22.2° | -59.9° $\pm$ 20.5° | -43.1° $\pm$ 23.1° | -52.7° $\pm$ 26.8° | -44.5° $\pm$ 16.8° |
| ROM <sup>a</sup> | 99.2° $\pm$ 43.0°  | 80.7° $\pm$ 41.3°  | 100.2° $\pm$ 42.2° | 85.2° $\pm$ 40.3°  | 96.8° $\pm$ 49.3°  | 83.4° $\pm$ 35.8°  |

*Effect of load<sup>a</sup>, Effect of grade<sup>b</sup>, Effect of load and grade<sup>c</sup> on plantarflexion (PFLX), dorsiflexion (DFLX), flexion (FLX), and extension (EXT).*

**Table S2a:** Mean  $\pm$  SD (degrees) of joint angles and range of motion (ROM) for OMC for each load (unloaded, loaded) and grade (flat, uphill, downhill) while walking.

| Walking              |                   |                   |                   |                   |                   |                   |
|----------------------|-------------------|-------------------|-------------------|-------------------|-------------------|-------------------|
|                      | Flat              |                   | Uphill            |                   | Downhill          |                   |
| Ankle                | Unloaded          | Loaded            | Unloaded          | Loaded            | Unloaded          | Loaded            |
| PFLX <sup>b</sup>    | -0.3° $\pm$ 3.7°  | 12.4° $\pm$ 1.4°  | -0.0° $\pm$ 4.1°  | 12.2° $\pm$ 3.8°  | 2.0° $\pm$ 3.6°   | 16.1° $\pm$ 5.1°  |
| DFLX <sup>b</sup>    | -33.8° $\pm$ 5.5° | -38.6° $\pm$ 8.7° | -34.3° $\pm$ 5.5° | -38.4° $\pm$ 7.8° | -35.9° $\pm$ 6.7° | -39.4° $\pm$ 8.5° |
| ROM <sup>b</sup>     | 33.4° $\pm$ 5.5°  | 50.9° $\pm$ 8.73° | 34.3° $\pm$ 5.5°  | 50.6° $\pm$ 7.4°  | 37.9° $\pm$ 6.7°  | 55.5° $\pm$ 9.1°  |
| Knee                 |                   |                   |                   |                   |                   |                   |
| EXT <sup>u,b,c</sup> | -3.2° $\pm$ 5.7°  | 8.0° $\pm$ 5.2°   | 1.1° $\pm$ 6.0°   | 12.2° $\pm$ 7.3°  | 1.6° $\pm$ 6.1°   | 10.3° $\pm$ 6.2°  |
| FLX <sup>u,b</sup>   | 67.1 $\pm$ 4.6°   | 84.9° $\pm$ 10.1° | 68.7° $\pm$ 5.1°  | 85.2° $\pm$ 9.4°  | 65.7° $\pm$ 4.6°  | 90.4° $\pm$ 10.4° |
| ROM <sup>a,c</sup>   | 70.3° $\pm$ 5.9°  | 76.9° $\pm$ 11.1° | 68.6° $\pm$ 5.5°  | 73.9° $\pm$ 10.4° | 65.1° $\pm$ 5.0°  | 80.1° $\pm$ 13.5° |
| Hip                  |                   |                   |                   |                   |                   |                   |
| FLX <sup>a,b</sup>   | 35.3° $\pm$ 8.0°  | 43.3° $\pm$ 9.5°  | 38.0° $\pm$ 8.5°  | 49.1° $\pm$ 10.9° | 41.3° $\pm$ 8.3°  | 50.0° $\pm$ 10.1° |
| EXT                  | -6.0° $\pm$ 8.7°  | -1.5° $\pm$ 6.0°  | -5.5° $\pm$ 7.7°  | -0.3° $\pm$ 6.5°  | -6.2° $\pm$ 8.3°  | -1.5° $\pm$ 6.5°  |
| ROM <sup>a,b,c</sup> | 41.3° $\pm$ 5.3°  | 44.9° $\pm$ 6.6°  | 43.5° $\pm$ 4.6°  | 49.4° $\pm$ 7.7°  | 47.5° $\pm$ 5.2°  | 51.5° $\pm$ 7.4°  |

**Table S2b:** Mean  $\pm$  SD (degrees) of joint angles and range of motion (ROM) for OMC for each load (unloaded, loaded) and grade (flat, uphill, downhill) while running.

| Running              |                   |                   |                   |                   |                   |                   |
|----------------------|-------------------|-------------------|-------------------|-------------------|-------------------|-------------------|
|                      | Flat              |                   | Uphill            |                   | Downhill          |                   |
| Ankle                | Unloaded          | Loaded            | Unloaded          | Loaded            | Unloaded          | Loaded            |
| PFLX <sup>b</sup>    | 2.5° $\pm$ 3.9°   | 16.4° $\pm$ 3.4°  | 0.3° $\pm$ 4.3°   | 8.5° $\pm$ 3.6°   | 1.4° $\pm$ 5.1°   | 8.3° $\pm$ 4.2°   |
| DFLX <sup>b</sup>    | -35.1° $\pm$ 5.7° | -39.1° $\pm$ 8.2° | -30.0° $\pm$ 5.9° | -35.4° $\pm$ 9.8° | -29.8° $\pm$ 5.7° | -35.3° $\pm$ 8.3° |
| ROM <sup>b</sup>     | 37.6° $\pm$ 5.2°  | 55.5° $\pm$ 8.0°  | 30.0° $\pm$ 5.5°  | 43.9° $\pm$ 10.0° | 31.2° $\pm$ 5.1°  | 43.6° $\pm$ 7.9°  |
| Knee                 |                   |                   |                   |                   |                   |                   |
| EXT <sup>u,b</sup>   | 3.1° $\pm$ 6.3°   | 14.3° $\pm$ 7.6°  | -3.9° $\pm$ 5.7°  | 3.9° $\pm$ 5.7°   | -0.6° $\pm$ 6.0°  | 6.3° $\pm$ 6.9°   |
| FLX <sup>b</sup>     | 68.3° $\pm$ 5.0°  | 88.1° $\pm$ 9.8°  | 70.6° $\pm$ 4.3°  | 83.5° $\pm$ 10.4° | 73.6° $\pm$ 5.0°  | 84.1° $\pm$ 11.8° |
| ROM <sup>a,b,c</sup> | 66.2° $\pm$ 5.8°  | 73.7° $\pm$ 13.7° | 73.7° $\pm$ 6.0°  | 79.6° $\pm$ 10.8° | 74.1° $\pm$ 6.1°  | 77.8° $\pm$ 22.4° |
| Hip                  |                   |                   |                   |                   |                   |                   |
| FLX <sup>a,b,c</sup> | 45.5° $\pm$ 9.4°  | 56.1° $\pm$ 11.1° | 32.6° $\pm$ 8.1°  | 39.5° $\pm$ 9.4°  | 35.7° $\pm$ 8.4°  | 43.8° $\pm$ 11.2° |
| EXT <sup>u</sup>     | -6.0° $\pm$ 7.4°  | -0.8° $\pm$ 7.0°  | -5.5° $\pm$ 8.1°  | -0.9° $\pm$ 6.7°  | -4.4° $\pm$ 8.1°  | 0.9° $\pm$ 6.4°   |
| ROM <sup>a,b,c</sup> | 51.5° $\pm$ 5.7°  | 56.9° $\pm$ 8.6°  | 38.0° $\pm$ 3.6°  | 40.4° $\pm$ 6.3°  | 40.1° $\pm$ 3.9°  | 42.9° $\pm$ 7.4°  |

Effect of load<sup>a</sup>, Effect of grade<sup>b</sup>, Effect of load and grade<sup>c</sup> on plantarflexion (PFLX), dorsiflexion (DFLX), flexion (FLX), and extension (EXT).
